# Supplementary material for: Harnessing the Endocannabinoid 2-Arachidonoylglycerol to Lower Intraocular Pressure in a Murine Model
Source: PubMed Central journal article supplement (PMC4961057; doi:10.1167/iovs.16-19356), 2016-06-22
Supplement: i1552-5783-57-7-3287-s1.pdf [file i1552-5783-57-7-3287-s1.pdf]

| <b><i>N</i>-acyl alanine</b>            | <b>[M – H]<sup>-</sup></b> | <b>Fragment</b> |
|-----------------------------------------|----------------------------|-----------------|
| <i>N</i> -palmitoyl alanine             | 326.5                      | 88.09           |
| <i>N</i> -stearoyl alanine              | 354.55                     | 88.09           |
| <i>N</i> -oleoyl alanine                | 352.53                     | 88.09           |
| <i>N</i> -linoleoyl alanine             | 350.52                     | 88.09           |
| <i>N</i> -arachidonoyl alanine          | 374.5                      | 88.09           |
| <i>N</i> -docosahexaenoyl alanine       | 398.56                     | 88.09           |
| <b><i>N</i>-acyl ethanolamine</b>       | <b>[M – H]<sup>-</sup></b> | <b>Fragment</b> |
| <i>N</i> -palmitoyl ethanolamine        | 300.29                     | 62.1            |
| <i>N</i> -stearoyl ethanolamine         | 328.3                      | 62.1            |
| <i>N</i> -oleoyl ethanolamine           | 326.3                      | 62.1            |
| <i>N</i> -linoleoyl ethanolamine        | 324.3                      | 62.1            |
| <i>N</i> -arachidonoyl ethanolamine     | 348.29                     | 62.1            |
| <i>N</i> -docosahexaenoyl ethanolamine  | 372.6                      | 62.1            |
| <b><i>N</i>-acyl GABA</b>               | <b>[M – H]<sup>-</sup></b> | <b>Fragment</b> |
| <i>N</i> -palmitoyl GABA                | 340.54                     | 102.1           |
| <i>N</i> -stearoyl GABA                 | 368.58                     | 102.1           |
| <i>N</i> -oleoyl GABA                   | 366.57                     | 102.1           |
| <i>N</i> -linoleoyl GABA                | 364.54                     | 102.1           |
| <i>N</i> -arachidonoyl GABA             | 388.57                     | 102.1           |
| <i>N</i> -docosahexaenoyl GABA          | 412.59                     | 102.1           |
| <b><i>N</i>-acyl glycine</b>            | <b>[M – H]<sup>-</sup></b> | <b>Fragment</b> |
| <i>N</i> -palmitoyl glycine             | 312.26                     | 74.2            |
| <i>N</i> -stearoyl glycine              | 340.3                      | 74.2            |
| <i>N</i> -oleoyl glycine                | 338.3                      | 74.2            |
| <i>N</i> -linoleoyl glycine             | 336.3                      | 74.2            |
| <i>N</i> -arachidonoyl glycine          | 360.3                      | 74.2            |
| <i>N</i> -docosahexaenoyl glycine       | 384.3                      | 74.2            |
| <b><i>N</i>-acyl leucine</b>            | <b>[M – H]<sup>-</sup></b> | <b>Fragment</b> |
| <i>N</i> -palmitoyl leucine             | 368.58                     | 130.1           |
| <i>N</i> -stearoyl leucine              | 396.63                     | 130.1           |
| <i>N</i> -oleoyl leucine                | 394.61                     | 130.1           |
| <i>N</i> -linoleoyl leucine             | 392.6                      | 130.1           |
| <i>N</i> -docosahexaenoyl leucine       | 440.64                     | 130.1           |
| <b><i>N</i>-acyl methionine</b>         | <b>[M – H]<sup>-</sup></b> | <b>Fragment</b> |
| <i>N</i> -palmitoyl methionine          | 386.62                     | 148.2           |
| <i>N</i> -stearoyl methionine           | 414.64                     | 148.2           |
| <i>N</i> -oleoyl methionine             | 412.65                     | 148.2           |
| <i>N</i> -linoleoyl methionine          | 410.64                     | 148.2           |
| <i>N</i> -arachidonoyl methionine       | 434.66                     | 148.2           |
| <i>N</i> -docosahexaenoyl methionine    | 458.68                     | 148.2           |
| <b><i>N</i>-acyl phenylalanine</b>      | <b>[M – H]<sup>-</sup></b> | <b>Fragment</b> |
| <i>N</i> -palmitoyl phenylalanine       | 402.59                     | 164.1           |
| <i>N</i> -stearoyl phenylalanine        | 430.65                     | 164.1           |
| <i>N</i> -oleoyl phenylalanine          | 428.63                     | 164.1           |
| <i>N</i> -linoleoyl phenylalanine       | 426.61                     | 164.1           |
| <i>N</i> -arachidonoyl phenylalanine    | 450.64                     | 164.1           |
| <i>N</i> -docosahexaenoyl phenylalanine | 474.66                     | 164.1           |
| <b><i>N</i>-acyl proline</b>            | <b>[M – H]<sup>-</sup></b> | <b>Fragment</b> |
| <i>N</i> -palmitoyl proline             | 352.53                     | 114.12          |
| <i>N</i> -stearoyl proline              | 380.59                     | 114.12          |
| <i>N</i> -oleoyl proline                | 378.31                     | 114.12          |
| <i>N</i> -linoleoyl proline             | 376.56                     | 114.12          |
| <i>N</i> -arachidonoyl proline          | 400.58                     | 114.12          |
| <i>N</i> -docosahexaenoyl proline       | 424.6                      | 114.12          |
| <b><i>N</i>-acyl serine</b>             | <b>[M – H]<sup>-</sup></b> | <b>Fragment</b> |
| <i>N</i> -palmitoyl serine              | 342.3                      | 74              |
| <i>N</i> -stearoyl serine               | 370.3                      | 74              |
| <i>N</i> -oleoyl serine                 | 368.3                      | 74              |
| <i>N</i> -linoleoyl serine              | 366.27                     | 74              |
| <i>N</i> -arachidonoyl serine           | 390.3                      | 74              |
| <i>N</i> -docosahexaenoyl serine        | 414.3                      | 74              |
| <b><i>N</i>-acyl taurine</b>            | <b>[M – H]<sup>-</sup></b> | <b>Fragment</b> |
| <i>N</i> -arachidonoyl taurine          | 410.6                      | 124             |
| <b><i>N</i>-acyl tryptophan</b>         | <b>[M – H]<sup>-</sup></b> | <b>Fragment</b> |
| <i>N</i> -palmitoyl tryptophan          | 441.63                     | 203.1           |
| <i>N</i> -stearoyl tryptophan           | 469.68                     | 203.1           |
| <i>N</i> -oleoyl tryptophan             | 467.67                     | 203.1           |
| <i>N</i> -linoleoyl tryptophan          | 465.65                     | 203.1           |
| <i>N</i> -arachidonoyl tryptophan       | 489.67                     | 203.1           |
| <i>N</i> -docosahexaenoyl tryptophan    | 513.69                     | 203.1           |
| <b><i>N</i>-acyl tyrosine</b>           | <b>[M – H]<sup>-</sup></b> | <b>Fragment</b> |
| <i>N</i> -palmitoyl tyrosine            | 418.59                     | 180.18          |
| <i>N</i> -stearoyl tyrosine             | 446.65                     | 180.18          |
| <i>N</i> -oleoyl tyrosine               | 444.63                     | 180.18          |
| <i>N</i> -linoleoyl tyrosine            | 442.61                     | 180.18          |
| <i>N</i> -arachidonoyl tyrosine         | 466                        | 180.18          |
| <i>N</i> -docosahexaenoyl tyrosine      | 490.66                     | 180.18          |
| <b><i>N</i>-acyl valine</b>             | <b>[M – H]<sup>-</sup></b> | <b>Fragment</b> |
| <i>N</i> -palmitoyl valine              | 354.31                     | 116.31          |
| <i>N</i> -stearoyl valine               | 382.6                      | 116.14          |
| <i>N</i> -oleoyl valine                 | 380.59                     | 116.14          |
| <i>N</i> -nervonoyl valine              | 464.75                     | 116.14          |
| <i>N</i> -linoleoyl valine              | 378.58                     | 116.14          |
| <i>N</i> -docosahexaenoyl valine        | 426.62                     | 116.14          |
| <b>Free Fatty Acids</b>                 | <b>[M – H]<sup>-</sup></b> | <b>Fragment</b> |
| Linoleic Acid                           | 279.5                      | 261             |
| Arachidonic Acid                        | 303.5                      | 285             |
| <b>2-acyl-<i>sn</i>-glycerol</b>        | <b>[M – H]<sup>-</sup></b> | <b>Fragment</b> |
| 2-arachidonoyl- <i>sn</i> -glycerol     | 379.3                      | 287.5           |
| 2-linoleoyl- <i>sn</i> -glycerol        | 355.5                      | 245             |
| 2-oleoyl- <i>sn</i> -glycerol           | 357.5                      | 265.2           |
| <b>Prostaglandins</b>                   | <b>[M – H]<sup>-</sup></b> | <b>Fragment</b> |
| PGE <sub>2</sub>                        | 351.2                      | 315             |
| PGF <sub>2α</sub>                       | 353.3                      | 309.2           |
| <b>Prostaglandin glycerol esters</b>    | <b>[M – H]<sup>-</sup></b> | <b>Fragment</b> |
| PGE <sub>2</sub> -G                     | 444.5                      | 391.2           |

**Supplemental Table 1** List of lipids screened in HPLC/MS/MS analysis of MAGL KO and WT mouse eyes and spinal cords with parent ion and fragment ion masses. Lipids are grouped by amide family and all members of that lipid family are screened in a multiple reactions monitoring (MRM) method. Negative ionization mode, resulting in a [M – H]<sup>-</sup> parent ion, is used for all methods except the *N*-acyl ethanolamine and 2-acyl glycerol methods, which uses positive ionization and generates a parent ion with a mass of [M + H]<sup>+</sup>. The parent ion is then fragmented into the collision chamber and an abundant fragment can be selected as the fragment ion. Therefore, unknown lipids are matched to known standards according to retention time from the analytical column and according to their mass fingerprint.
